# Supplementary material for: Metabolomic Recovery as a Result of Ischemic Preconditioning Was More Pronounced in Hippocampus than in Cortex That Appeared More Sensitive to Metabolomic Blood Components
Source: MDPI journal article supplement (doi:10.3390/metabo11080516), 2021-08-05
Supplement: s1 [file s1]

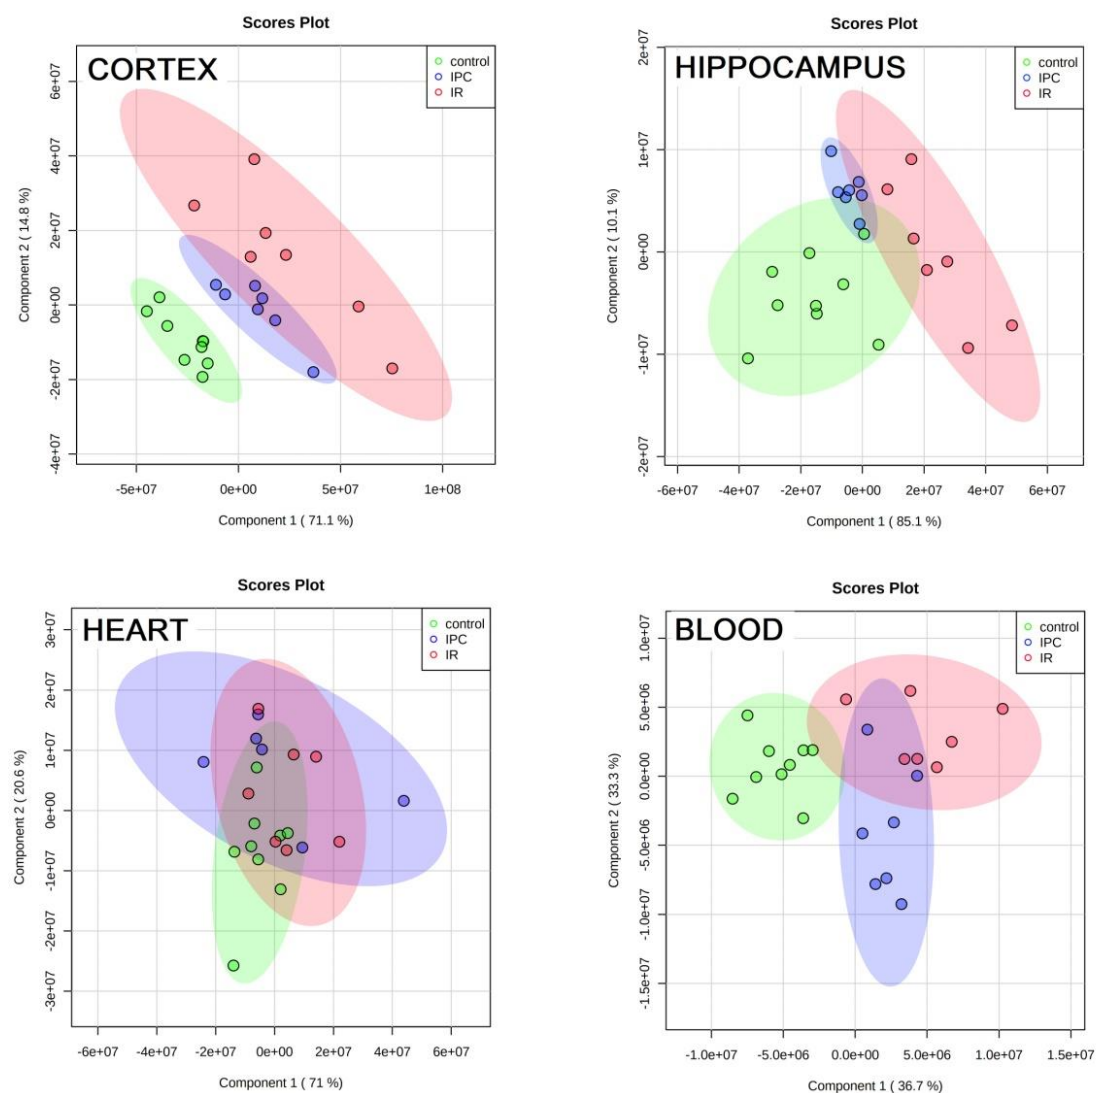

**Figure S1.** PLS-DA analyzes of system C-IR-IPC for cortex, hippocampus, heart and blood plasma in control, IR and IPC rats, as variables were used relative concentrations of metabolites determined by NMR.

## HIPPOCAMPUS

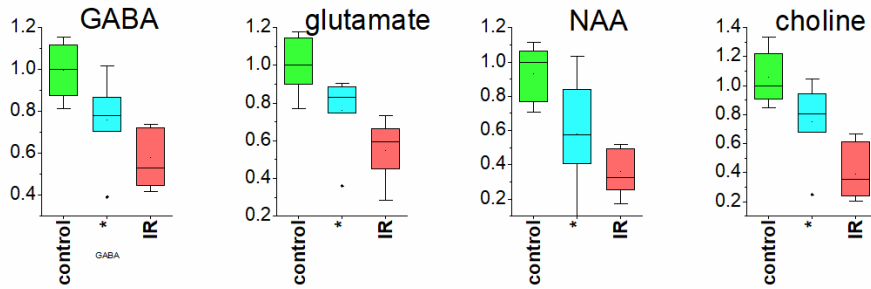

## CORTEX

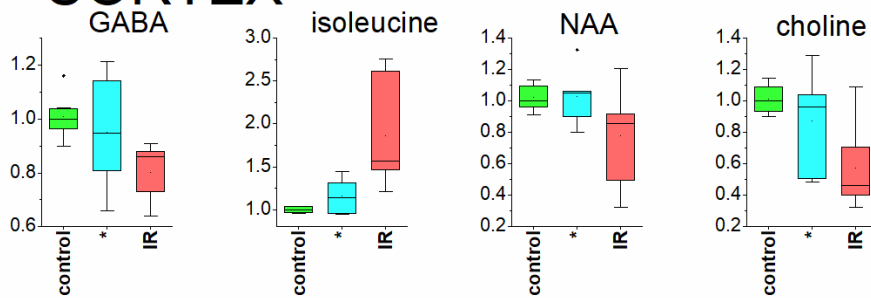

## HEART

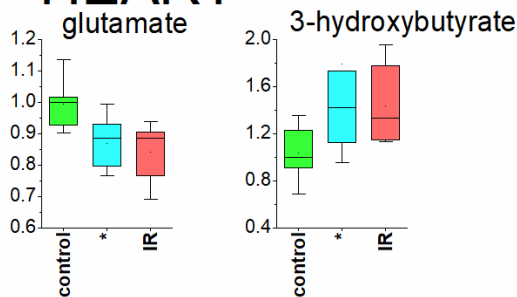

## BLOOD (plasma)

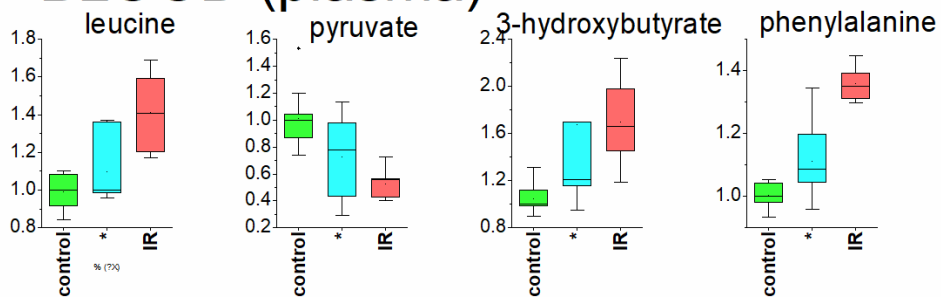

**Figure S2.** Relative levels of selected plasma metabolites in cortex, hippocampus and heart in animals after detected and verified incomplete ischemia, \* - rats not fulfilling criteria for ischemia completeness, IR - rats fulfilling criteria for ischemia completeness.

**Table S1.** Chemical shifts (in ppm), J couplings (in Hz) and multiplicities for the pool of metabolites identified in tissue extracts and deproteinated plasma by NMR. The proton NMR chemical shifts are reported relative to TMS-d<sub>4</sub> signal which was assigned a chemical shift of 0.000 ppm. + -metabolite found, - -metabolite not found, or assignment of peaks was not unambiguous. Chemical shifts in particular material may differ from values listed, however the difference did not exceed 0.003 ppm.

| metabolite                                 | blood plasma | cortex | hippocampus | heart | NMR peak assignment, confirmed by jres and cosy                                                                                                      |
|--------------------------------------------|--------------|--------|-------------|-------|------------------------------------------------------------------------------------------------------------------------------------------------------|
| lactate                                    | +            | +      | +           | +     | 1.329 (d; J = 6.97), 4.116 (q; J = 6.97)                                                                                                             |
| glutamine                                  | +            | +      | +           | +     | 2.1167 (m), 2.1534 (m), 2.441 (m), 2.477 (m), 3.766 (dd)                                                                                             |
| histidine                                  | +            | -      | -           | -     | 7.067 (s), 7.796 (s)                                                                                                                                 |
| isoleucine                                 | +            | +      | +           | +     | 0.941 (t; J = 7.48), 1.0123 (d; J = 6.99), 3.678 (d; J = 4.17)                                                                                       |
| leucine                                    | +            | +      | +           | +     | 0.958 (d; J = 6.23), 0.969d (d; J = 6.05), 1.679 (m), 1.720 (m), 1.749 (m)                                                                           |
| lysine                                     | +            | -      | -           | -     | 1.457 (m), 1.496 (m), 1.734 (m), 1.885 (m), 1.9255(m), 3.030 (t; J=7.63)                                                                             |
| phenylalanine                              | +            | +      | +           | +     | 3.126 (m), 3.284 (m), 7.3403 (d; J=7.46), 7.383 (t; J=7.36), 7.436 (t)                                                                               |
| threonine                                  | +            | -      | -           | -     | 1.329 (d), 3.582 (d; J=4.93), 4.253 (m)                                                                                                              |
| tryptophan                                 | +            | -      | -           | -     | 7.2087 (t), 7.292 (t), 7.334 (s), 7.556 (d), 7.743 (d; J = 8.02)                                                                                     |
| tyrosine                                   | +            | +      | +           | +     | 3.053 (dd), 3.193 (dd), 3.929 (dd), 6.906 (d; J=8.50), 7.201 (d; J=8.50)                                                                             |
| valine                                     | +            | +      | +           | +     | 0.9936 (d; J=7.06), 1.044 (d; J=7.06), 2.273 (m), 3.607 (d; J=4.40)                                                                                  |
| pyruvate                                   | +            | -      | -           | -     | 2.376 (s)                                                                                                                                            |
| citrate                                    | +            | -      | -           | -     | 2.5409 (d), 2.6717 (d)                                                                                                                               |
| acetate                                    | +            | -      | -           | -     | 1.9207 (s)                                                                                                                                           |
| alanine                                    | +            | +      | +           | +     | 1.484 (d; J=7.30), 3.779 (q)                                                                                                                         |
| glucose                                    | +            | -      | -           | -     | 3.233 (m), 3.398 (m), 3.458 (m), 3.524 (dd), 3.782 (m), 3.824 (m), 3.889 (dd), 4.634 (d), 5.233 (d)                                                  |
| 3-hydroxybutyrate                          | +            | -      | -           | +     | 1.203(d; J=6.26), 2.307(dd; J= 14.36, 6.30), 2.393(dd; J= 14.36, 7.32), 4.138(m)                                                                     |
| 2-oxoisocaproate (ketoleucine)             | +            | -      | -           | -     | 0.943 (d; J=6.63), 2.113 (m), 2.612 (d; J=7.02)                                                                                                      |
| $\alpha$ -ketoisovalerate (2-ketovaline)   | +            | -      | -           | -     | 1.11 (d; J=7.05), 3.011 (dq)                                                                                                                         |
| 3-methyl-2-oxo-valerate (2-ketoisoleucine) | +            | -      | -           | -     | 0.899 (t; J=7.52), 1.104 (d; J=6.74)                                                                                                                 |
| acetone                                    | +            | -      | -           | -     | 2.236 (s)                                                                                                                                            |
| acetoacetate                               | +            | -      | -           | -     | 2.282(s), 3.427(s)                                                                                                                                   |
| formate                                    | +            | -      | -           | -     | 8.461 (s)                                                                                                                                            |
| glutamate                                  | -            | +      | +           | +     | 2.0055(m), 2.140(m), 2.346(m), 2.376(m), 3.756(dd; J = 7.18, 4.72)                                                                                   |
| GABA (4-aminobutyrate)                     | -            | +      | +           | -     | 1.905(m), 2.3001(t; J=7.35), 3.025(t; J=7.58)                                                                                                        |
| succinate                                  | -            | +      | +           | +     | 2.405(s)                                                                                                                                             |
| aspartate                                  | -            | +      | +           | -     | 2.667(m), 2.820(m), 3.903(m)                                                                                                                         |
| myo-Inositol                               | -            | +      | +           | -     | 3.282(t; J = 9.34), 3.534(dd), 3.629(t), 4.065(t; J = 2.91)                                                                                          |
| creatine                                   | +            | +      | +           | +     | 3.043(s), 3.928(t)                                                                                                                                   |
| taurine                                    | -            | +      | +           | +     | 3.259(t; J = 6.57), 3.428(t; J = 6.61)                                                                                                               |
| niacinamide                                | -            | +      | +           | +     | 7.600(dd, J = 7.90, 5.06), 8.252(dd, J = 7.98), 8.719(dd, J = 4.6, 1.12), 8.944(dd)                                                                  |
| fumarate                                   | -            | +      | +           | +     | 6.519(s)                                                                                                                                             |
| inosine                                    | -            | +      | +           | +     | 3.835(dd; J = 12.77, 4.03), 3.906(dd; J = 12.77, 3.09), 4.279(dd; J = 7.05, 3.08), 4.438(dd; J = 4.99, 3.95), 6.102(d; J = 5.67), 8.232(s), 8.337(s) |
| ascorbate                                  | -            | +      | +           | -     | 3.728(m), 3.760(m), 4.018(m), 4.508(d; J = 2.04)                                                                                                     |
| NAA (N-acetylaspartate)                    | -            | +      | +           | -     | 2.021(s), 2.494(m), 2.692(m), 4.367(m)                                                                                                               |
| choline                                    | -            | +      | +           | +     | 3.203(s), 3.518(m), 4.057(m)                                                                                                                         |
| o-phosphocholine                           | -            | +      | +           | +     | 3.221(s), 3.591(m), 4.172(m)                                                                                                                         |

**Table S2.** Results from leave-one-out cross-validated PLS-DA statistical discrimination: R2, Q2 performance measured by accuracy, \* negative Q2 is a sign of overfitted model.

|                    |          | number of components | accuracy | R2   | Q2     |
|--------------------|----------|----------------------|----------|------|--------|
| <b>cortex</b>      | IR/C     | 2                    | 0.94     | 0.72 | 0.51   |
|                    | IPC/C    | 5                    | 1        | 0.99 | 0.9    |
|                    | IR/IPC   | 2                    | 1        | 0.92 | 0.85   |
|                    | IR/IPC/C | 3                    | 0.95     | 0.74 | 0.48   |
| <b>hippocampus</b> | IR/C     | 3                    | 1        | 0.86 | 0.69   |
|                    | IPC/C    | 3                    | 1        | 0.91 | 0.77   |
|                    | IR/IPC   | 5                    | 1        | 0.92 | -0.26* |
|                    | IR/IPC/C | 4                    | 0.91     | 0.89 | 0.65   |
| <b>heart</b>       | IR/C     | 3                    | 0.75     | 0.75 | 0.08   |
|                    | IPC/C    | 4                    | 1        | 0.88 | 0.69   |
|                    | IR/IPC   | 3                    | 0.85     | 0.77 | 0.47   |
|                    | IR/IPC/C | 5                    | 0.64     | 0.67 | -0.25* |
| <b>blood</b>       | IR/C     | 5                    | 1        | 0.93 | 0.65   |
|                    | IPC/C    | 2                    | 0.94     | 0.82 | 0.6    |
|                    | IR/IPC   | 3                    | 0.93     | 0.88 | 0.44   |
|                    | IR/IPC/C | 4                    | 0.87     | 0.86 | 0.68   |
